# Supplementary material
Source: Springer Nature journal article supplement (https://www.springermedizin.de/resource/supplementary/12960_2009_222_MOESM3_ESM.pdf/9570684)

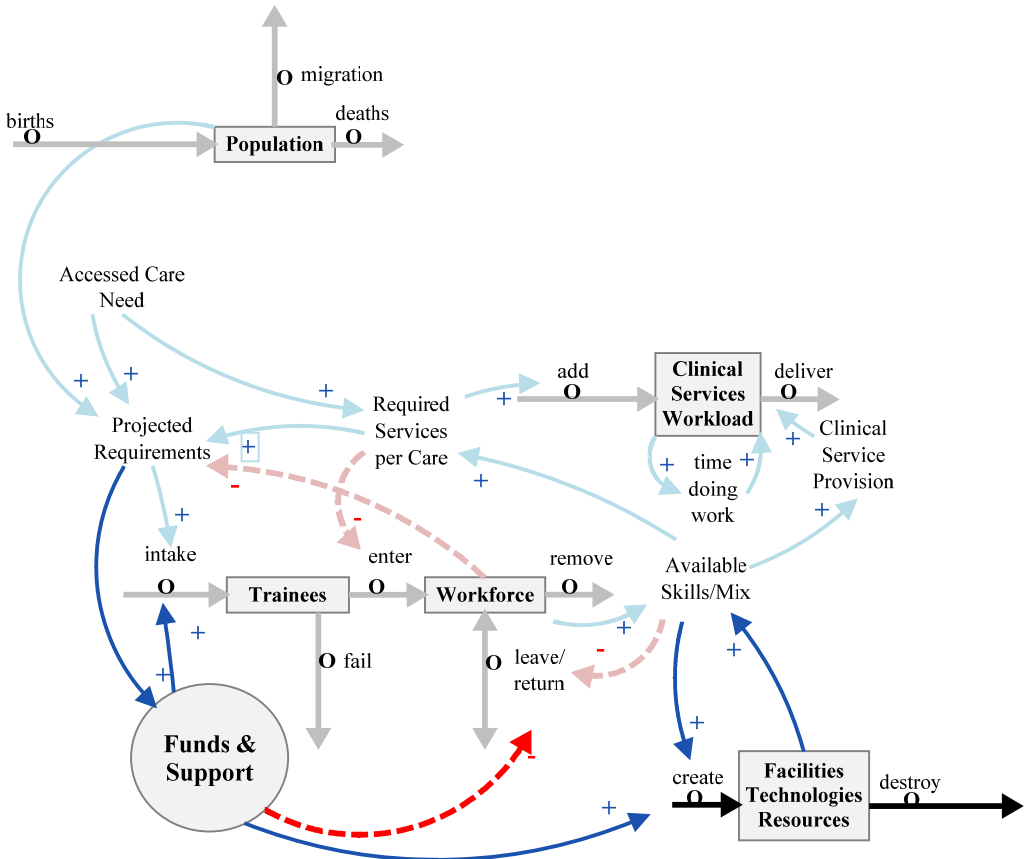

Supplement: MOESM3 [file 9570684]
